# Supplementary material for: CellProfiler 4: improvements in speed, utility and usability
Source: Springer Nature journal article supplement (doi:10.1186/s12859-021-04344-9), 2021-09-10
Supplement: 12859_2021_4344_MOESM1_ESM.pdf [file 12859_2021_4344_MOESM1_ESM.pdf]

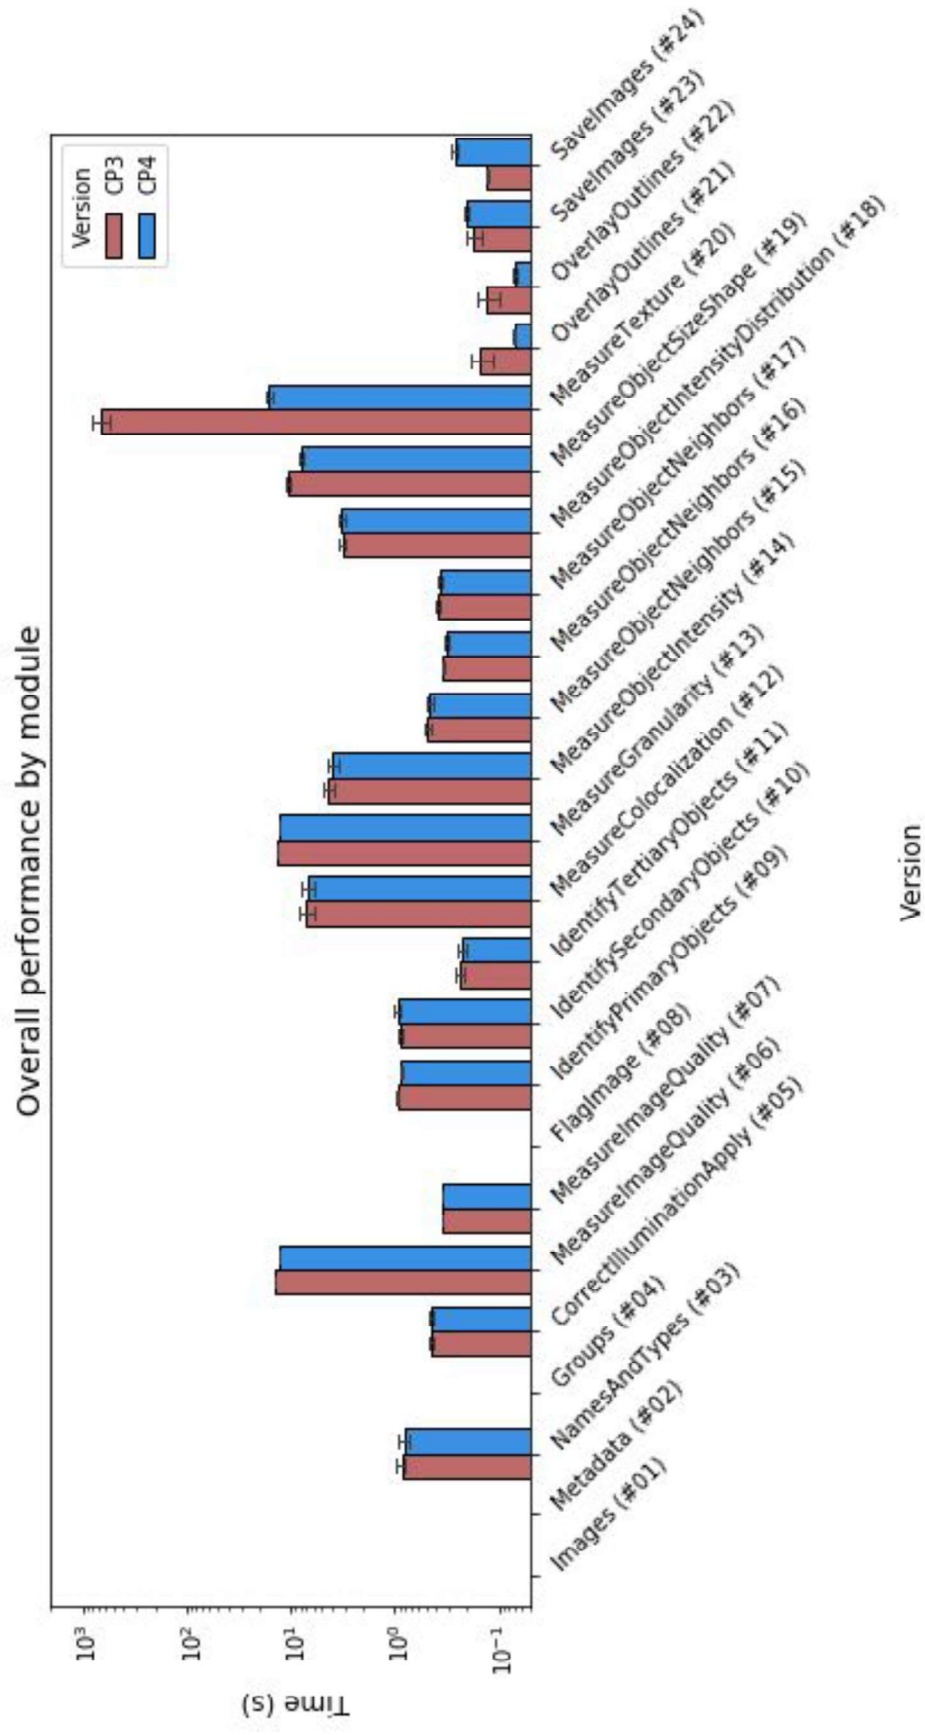

Figure S1
